# Supplementary material for: X-ray sensitive selenium-containing Ru complexes sensitize nasopharyngeal carcinoma cells for radio/chemotherapy
Source: Royal Society of Chemistry journal article supplement (doi:10.1039/d3tb00064h), 2023-01-01
Supplement: d3tb00064h1.pdf [file d3tb00064h1.pdf]

Supporting information

**X-ray Sensitive Selenium-Containing Ru complexes Sensitize Nasopharyngeal Carcinoma Cells for Radio-/Chemotherapy**

Changhe Shi<sup>1</sup>, Zhongwen Yuan<sup>1</sup>, Ting Liu, Leung Chan, Tianfeng Chen\*, Jianfu Zhao\*

Department of Oncology, the First Affiliated Hospital, Department of Chemistry, Jinan University,  
Guangzhou, 510632, China

*\*Corresponding author.*

*<sup>1</sup> These authors contributed equally.*

*Email addresses: tchentf@jnu.edu.cn (T. Chen); zhaojianfu@jnu.edu.cn (J. Zhao)*

## Results

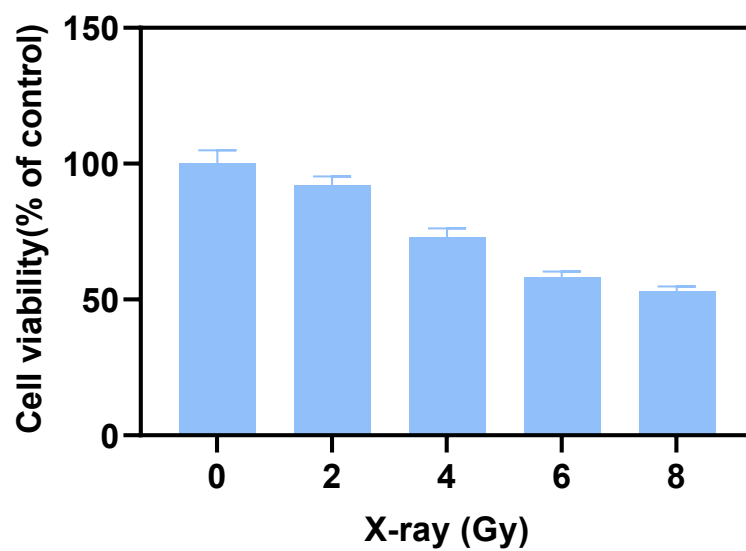

Figure S1. CNE-2 cells under X-rays (0 - 8 Gy) irradiation then incubated for another 72 h.

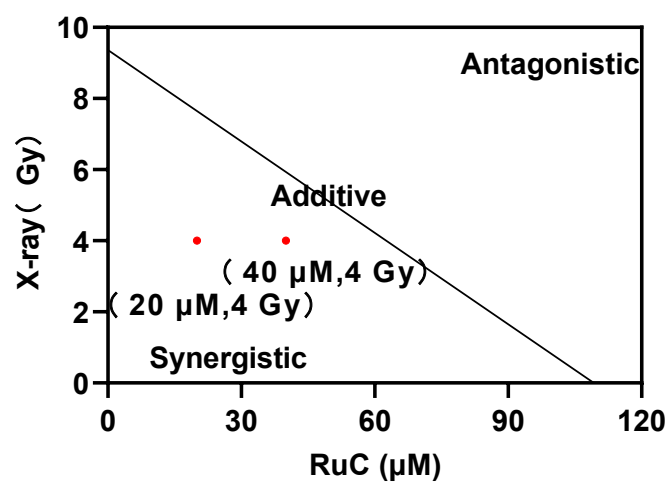

Figure S2. Isobologram analysis of RuC on cell viability.

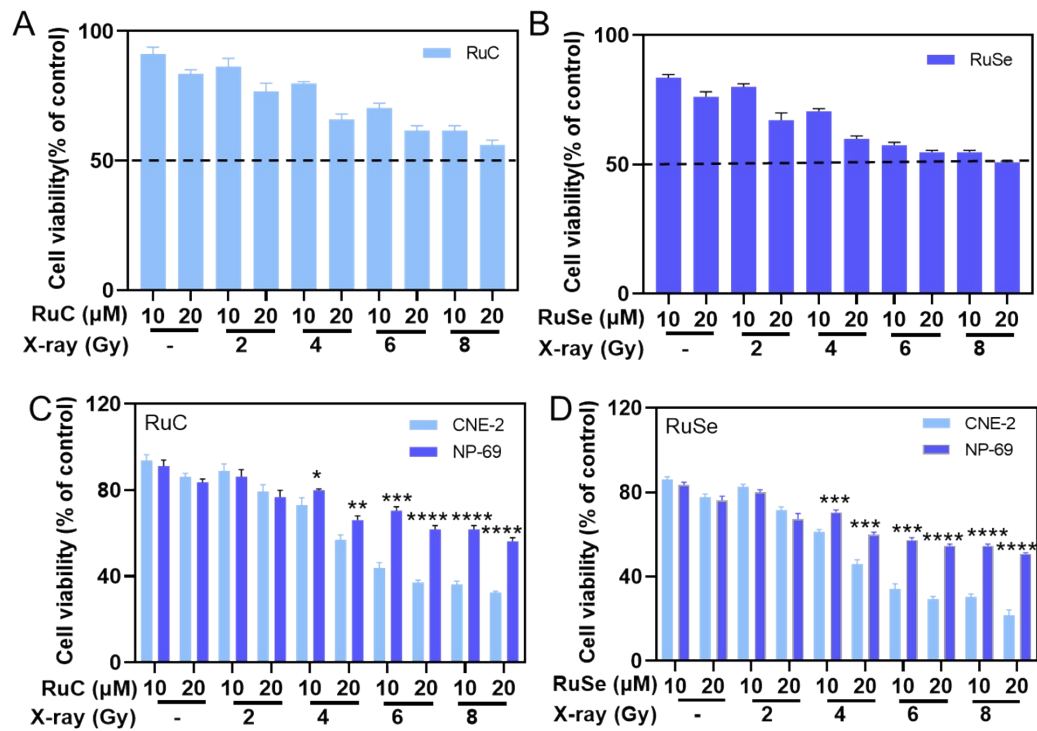

Figure S3. The cell viability of NP69 cells treated with (A) RuC and (B) RuSe for 72 h. Under acting with or without X-ray, the cell viability of CNE-2 and NP69 cells treated with (C) RuC and (D) RuSe for 72 h.

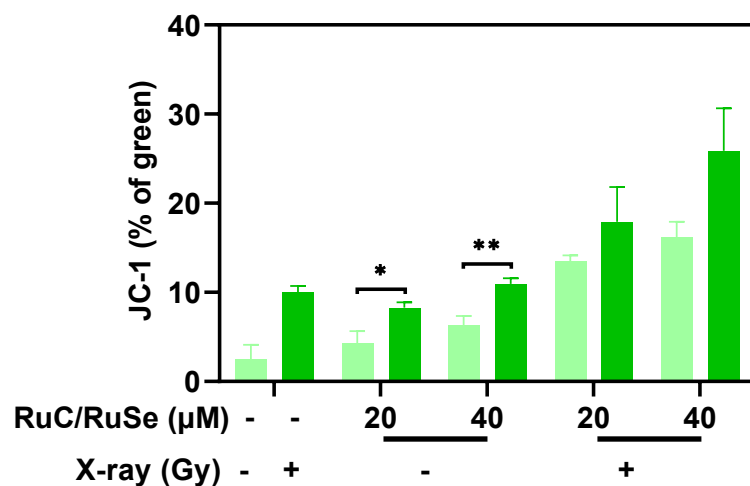

Figure S4. Quantitative analysis of CNE-2 cells mitochondrial membrane potential.

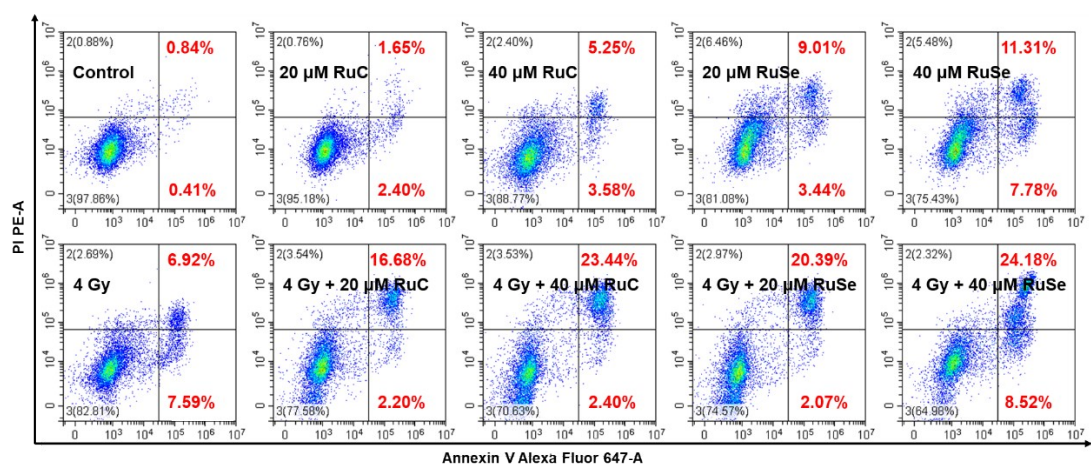

Figure S5. Cellular apoptosis analysis of CNE-2 cells induced by the combination therapy of different Ru complexes and X-ray.
